# Supplementary material for: Applications of CNOP-P Method to Predictability Studies of Terrestrial Ecosystems
Source: MDPI journal article supplement (doi:10.3390/atmos14040617), 2023-03-24
Supplement: s1 [file s1]

**Table S1.** The chosen physical parameters in studies of Sun and Mu [46,47].

| No. | Parameter           | Standard | Minimum | Maximum | Description                                                              |
|-----|---------------------|----------|---------|---------|--------------------------------------------------------------------------|
| 1   | $\theta^*$          | 0.7      | 0.2     | 0.996   | Co-limitation shape parameter                                            |
| 2   | $\alpha_a^*$        | 0.5      | 0.3     | 0.7     | fraction of PAR assimilated at ecosystem level<br>relative to leaf level |
| 3   | $\lambda_{\max,C3}$ | 0.7      | 0.6     | 0.8     | Optimal $C_i/C_a$ for C3 plants (all PFTs except<br>TrH)                 |
| 4   | $\alpha_{C3}^*$     | 0.08     | 0.02    | 0.125   | Intrinsic quantum efficiency of CO <sub>2</sub> uptake in C3<br>plants   |
| 5   | $a_{C3}^*$          | 0.015    | 0.01    | 0.021   | Leaf respiration as a fraction of Rubisco capacity<br>in C3 plants       |
| 6   | $Q_{10,ko}$         | 1.2      | 1.1     | 1.3     | q10 for temperature-sensitive parameter ko                               |
| 7   | $Q_{10,kc}$         | 2.1      | 1.9     | 2.3     | q10 for temperature-sensitive parameter kc                               |
| 8   | $Q_{10,\tau}$       | 0.57     | 0.47    | 0.67    | q10 for temperature-sensitive parameter tau                              |
| 9   | $r_{growth}^*$      | 0.25     | 0.15    | 0.4     | Growth respiration per unit <i>NPP</i>                                   |
| 10  | $g_m^*$             | 3.26     | 2.5     | 18.5    | Maximum canopy conductance analogue [mm<br>d <sup>-1</sup> ]             |
| 11  | $\alpha_m$          | 1.391    | 1.1     | 1.5     | Evapotranspiration parameter                                             |
| 12  | $k_{allom1}$        | 100      | 75      | 125     | Crown area= $k_{allom1}$ *height** $k_{rp}$                              |
| 13  | $k_{allom2}$        | 40       | 30      | 50      | height= $k_{allom2}$ *diameter** $k_{allom3}$                            |
| 14  | $k_{allom3}$        | 0.67     | 0.5     | 0.8     | height= $k_{allom2}$ *diameter** $k_{allom3}$                            |
| 15  | $k_{la:sa}^*$       | 6000     | 2000    | 8000    | leaf-to-sapwood area ratio                                               |
| 16  | $k_{rp}$            | 1.5      | 1.37    | 1.6     | Crown area= $k_{allom1}$ *height** $k_{rp}$                              |
| 17  | $k_{mort1}^*$       | 0.01     | 0.005   | 0.1     | Asymptotic maximum mortality rate [yr <sup>-1</sup> ]                    |
| 18  | $k_{mort2}$         | 0.4      | 0.2     | 0.5     | growth efficiency mortality scalar                                       |

|    |                          |      |      |      |                                                                       |
|----|--------------------------|------|------|------|-----------------------------------------------------------------------|
| 19 | $est_{\max}^*$           | 0.24 | 0.05 | 0.48 | Maximum sapling establishment rate [ $\text{m}^{-2} \text{yr}^{-1}$ ] |
| 20 | $n_0$                    | 7.15 | 6.85 | 7.45 | leaf N concentration (mg/g) not involved in photosynthesis            |
| 21 | $dens_{\text{wood}}$     | 200  | 180  | 220  | specific wood density [ $\text{kgC m}^{-3}$ ]                         |
| 22 | $\tau_{\text{litter}}^*$ | 0.35 | 0.19 | 0.81 | litter turnover time at 10°C [yr]                                     |
| 23 | $p_t$                    | 1.32 | 1.12 | 1.52 | Priestley-Taylor coefficient                                          |
| 24 | $\beta$                  | 0.17 | 0.15 | 0.19 | global average short-wave albedo                                      |

**Table S2.** The chosen physical parameters in studies of Sun et al. [48].

| Number of Parameters (NP) | Parameter            | Standard | Minimum | Maximum | Description                                                           |
|---------------------------|----------------------|----------|---------|---------|-----------------------------------------------------------------------|
| 1                         | $\theta^*$           | 0.7      | 0.2     | 0.996   | Co-limitation shape parameter                                         |
| 2                         | $\alpha_a^*$         | 0.5      | 0.3     | 0.7     | Fraction of PAR assimilated at ecosystem level relative to leaf level |
| 3                         | $\lambda_{\max, C3}$ | 0.7      | 0.6     | 0.8     | Optimal $ci=ca$ for C3 plants (all PFTs except TrH)                   |
| 4                         | $\alpha_{C3}^*$      | 0.08     | 0.02    | 0.125   | Intrinsic quantum efficiency of $\text{CO}_2$ uptake in C3 plants     |
| 5                         | $a_{C3}^*$           | 0.015    | 0.01    | 0.021   | Leaf respiration as a fraction of Rubisco capacity in C3 plants       |
| 6                         | $Q_{10, ko}$         | 1.2      | 1.1     | 1.3     | q10 for temperature-sensitive parameter ko                            |
| 7                         | $Q_{10, kc}$         | 2.1      | 1.9     | 2.3     | q10 for temperature-sensitive                                         |

|    |                   |       |        |        |                                                                                    |
|----|-------------------|-------|--------|--------|------------------------------------------------------------------------------------|
|    |                   |       |        |        | parameter kc                                                                       |
| 8  | $Q_{10,\tau}$     | 0.57  | 0.47   | 0.67   | q10 for temperature-sensitive<br>parameter tau                                     |
| 9  | $g_m^*$           | 3.26  | 2.5    | 18.5   | Maximum canopy conductance<br>analogue [mm d <sup>-1</sup> ]                       |
| 10 | $\alpha_m$        | 1.391 | 1.1    | 1.5    | Evapotranspiration parameter                                                       |
| 11 | $k_{allom3}$      | 0.67  | 0.5    | 0.8    | Height=kallom2*diameter**kal<br>lom3                                               |
| 12 | $k_{rp}$          | 1.5   | 1.37   | 1.6    | Crown<br>area=kallom1*height**krp                                                  |
| 13 | $k_{mort1}^*$     | 0.01  | 0.005  | 0.1    | Asymptotic maximum<br>mortality rate [yr <sup>-1</sup> ]                           |
| 14 | $k_{mort2}$       | 0.4   | 0.2    | 0.5    | Growth efficiency mortality<br>scalar                                              |
| 15 | $est_{max}^*$     | 0.24  | 0.05   | 0.48   | Maximum sapling<br>establishment rate [m <sup>-2</sup> yr <sup>-1</sup> ]          |
| 16 | $n_0$             | 7.15  | 6.85   | 7.45   | Leaf N concentration (mg/g)<br>not involved in photosynthesis                      |
| 17 | $\tau_{litter}^*$ | 0.35  | 0.19   | 0.81   | Litter turnover time at 10°C<br>[yr]                                               |
| 18 | $p_t$             | 1.32  | 1.12   | 1.52   | Priestley-Taylor coefficient                                                       |
| 19 | $\beta$           | 0.17  | 0.15   | 0.19   | Global average short-wave<br>albedo                                                |
| 20 | $k_f$             | 0.03  | 0.027  | 0.033  | fast pool decomposition rate at<br>10 deg C                                        |
| 21 | $k_s$             | 0.001 | 0.0009 | 0.0011 | slow pool decomposition rate<br>at 10 deg C                                        |
| 22 | $f_{inter}$       | 0.985 | 0.85   | 0.99   | fraction of soil-bound<br>decomposed litter entering the<br>intermediate soil pool |

|    |           |                  |       |      |                                                                                |
|----|-----------|------------------|-------|------|--------------------------------------------------------------------------------|
| 23 | $f_{air}$ | 0.7              | 0.5   | 0.9  | fraction of the decomposed litter emitted as CO <sub>2</sub> to the atmosphere |
| 24 | $k_1$     | 5.0 <sup>1</sup> | 4.5   | 5.5  | variables in percolation equation                                              |
|    |           | 4.0 <sup>2</sup> | 3.6   | 4.4  |                                                                                |
|    |           | 3.0 <sup>3</sup> | 2.7   | 3.3  |                                                                                |
|    |           | 4.5 <sup>4</sup> | 4.05  | 4.95 |                                                                                |
|    |           | 4.0 <sup>5</sup> | 3.6   | 4.4  |                                                                                |
|    |           | 3.5 <sup>6</sup> | 3.15  | 3.85 |                                                                                |
|    |           | 4.0 <sup>7</sup> | 3.6   | 4.4  |                                                                                |
|    |           | 9.0 <sup>8</sup> | 8.1   | 9.9  |                                                                                |
|    |           | 0.2 <sup>9</sup> | 0.18  | 0.22 |                                                                                |
| 25 | $k_2$     | 2.00             | 1.80  | 2.20 | variables in percolation equation                                              |
| 26 | $f_1$     | 0.9              | 0.6   | 1.0  | Fraction of active fraction of roots uptaking water from top soil layer        |
| 27 | $i_{ntc}$ | 0.02             | 0.005 | 0.08 | LAI parameter, interception storage parameter                                  |
| 28 | $f_{air}$ | 0.3              | 0.15  | 0.4  | Flammability threshold                                                         |

---

1, 2, 3, 4, 5, 6, 7, 8, 9 indicate the different soil type. 1 represents coarse loamy sand. 2 represents medium silty clay loam. 3 represents fine and non-vertisol light clay. 4 represents medium-coarse sandy loam. 5 represents fine-coarse sandy clay. 6 represents fine-medium clay loam. 7 represents fine-medium-coarse sandy clay loam. 8 is organic. 9 represents land ice and describes it as loamy sand.
